# Supplementary material for: Serial crystallography with multi-stage merging of thousands of images
Source: PubMed Central journal article supplement (PMC9254899; doi:10.1107/s2053230x22006422), 2022-07-04
Supplement: f-78-00281-sup1.pdf [file f-78-00281-sup1.pdf]

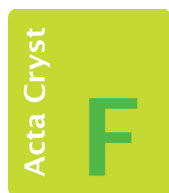

STRUCTURAL BIOLOGY  
COMMUNICATIONS

**Volume 78 (2022)**

**Supporting information for article:**

**Serial crystallography with multi-stage merging of thousands of images**

**Alexei S. Soares, Yusuke Yamada, Jean Jakoncic, Sean McSweeney, Robert M. Sweet, John Skinner, James Foadi, Martin R. Fuchs, Dieter K. Schneider, Wuxian Shi, Babak Andi, Lawrence C. Andrews and Herbert J. Bernstein**

## Supporting Information

### *S1. Electron Counting of Ligand Occupancies*

The occupancy of benzamidine (BEN) and N-acetylglucosamine (NAG) ligands deduced from the integrated electron density in the volume occupied by each ligand is shown in Fig. S1. The data clusters 3 (Fig. S4), 28 (Fig. S5), 43 (Fig. S6), and 62 (Fig. S7) were obtained using two-stage clustering (BLEND<sup>NCDist</sup> followed by BLEND<sup>SFDist</sup>), as described in §4. Electron density maps were placed on an absolute scale using iterative density modification (Soares & Caspar, 2017) and the electron density within the envelope of each ligand was integrated. The occupancy was deduced by comparing the observed number of electrons within each ligand envelope with the expected number of electrons in the apo- and holo- structures. If we disregard any cross-contamination during sample preparation (§3, ¶3), we would expect perfect clustering to result in four electron density maps where all ligands have occupancy of zero or unity. The observed occupancies were 0.18 & 0.00 (native), 0.62 & 0.03 (BEN+/NAG-), 0.09 & 1.00 (BEN-/NAG+) and 1.00 & 0.67 (BEN+/NAG+). The observed occupancies are, on average, 12.6% different from the ideal values of zero and unity.

### *S2. Data Reduction and Structure Solving Statistics*

The data reduction and structure solving statistics are given in Tables S1, S2 and S3. Because the largest clusters merge structures with significantly different ligands some of the R-factors degrade rather than improve. This is only to be expected. See (Kleywegt & Jones, 1997) for more information on  $R_{free}$  and  $R_{work}$ .

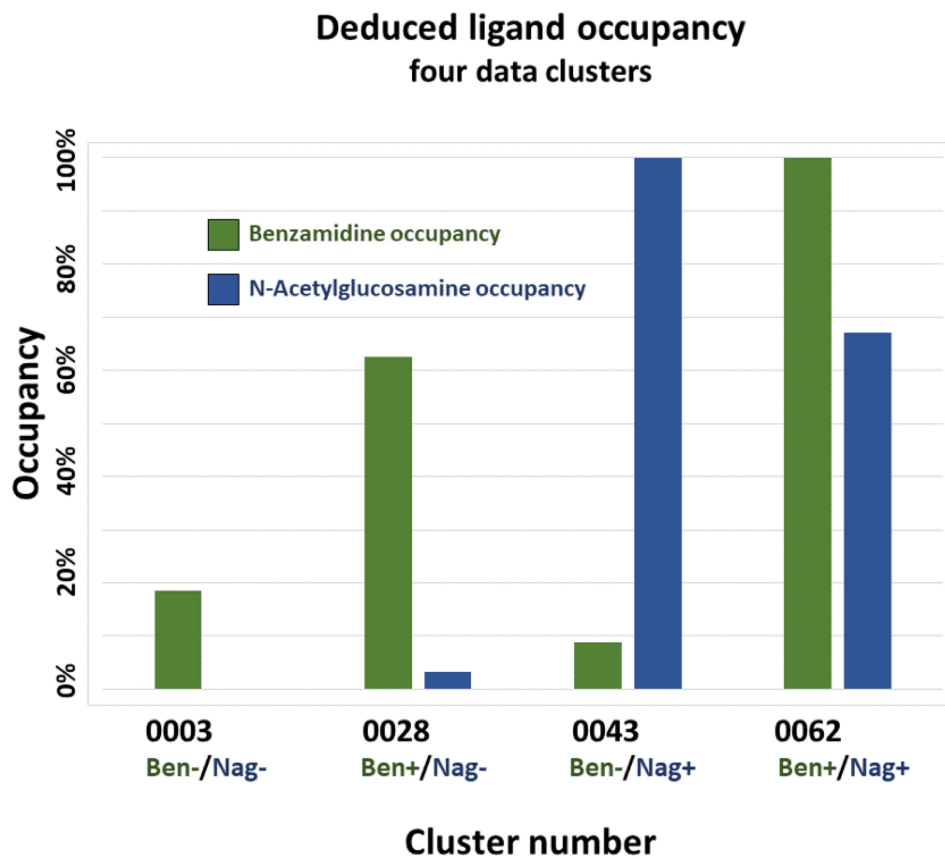

Fig. S1. Occupancy of benzamidine (BEN) and N-Acetylglucosamine (NAG) ligands deduced from the integrated electron density in the volume occupied by each ligand. The data clusters were obtained using two-stage clustering (BLEND<sup>NCDist</sup> followed by BLEND<sup>SFDist</sup>)

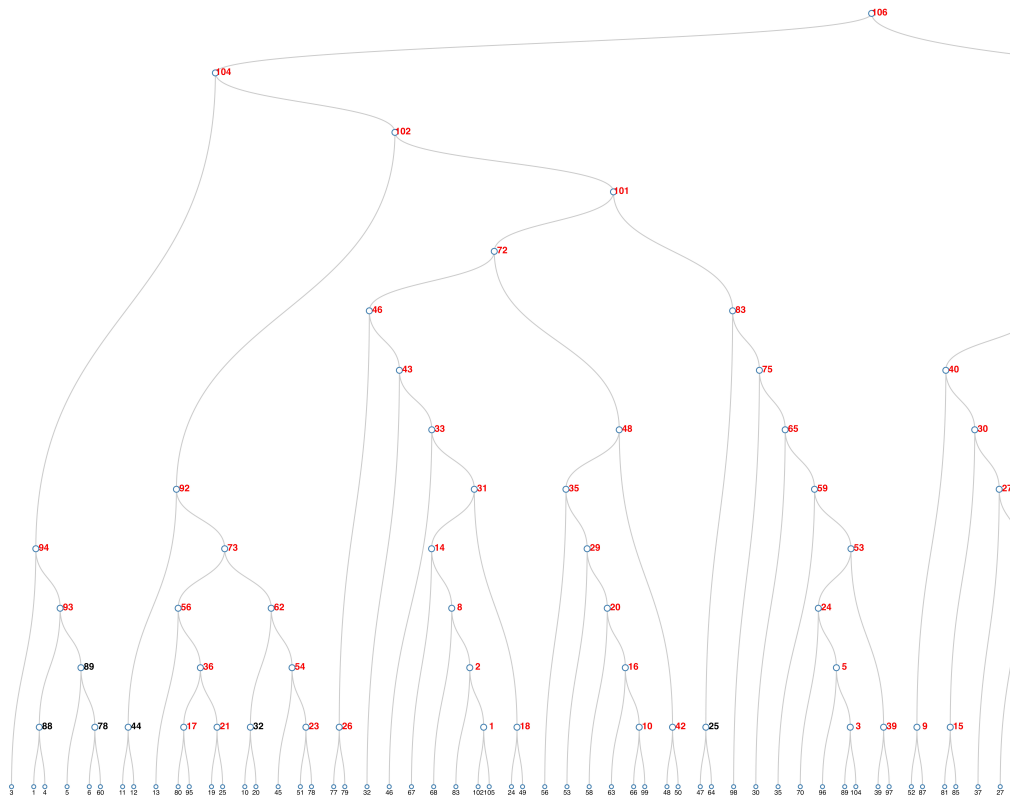

Fig. S2. Left half of the complete dendrogram for all the data clusters that were obtained using two-stage clustering (BLEND<sup>NCDist</sup> followed by BLEND<sup>SFDist</sup>). The other half of this dendrogram is shown in Fig. S3.

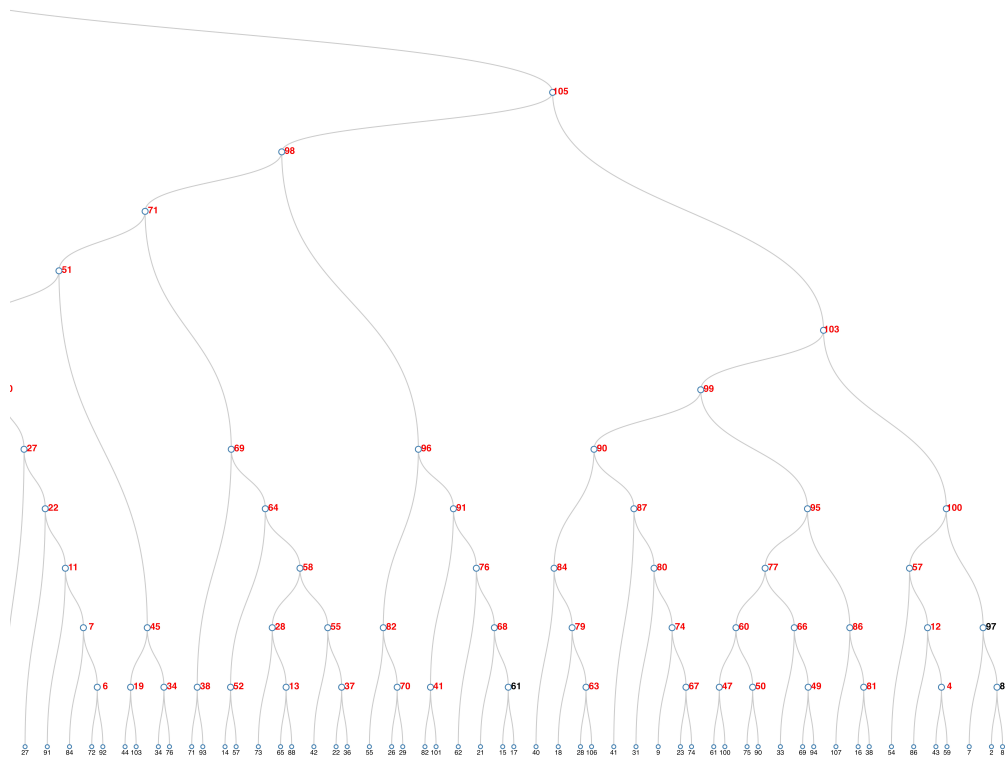

Fig. S3. Right half of the complete dendrogram for all the data clusters that were obtained using two-stage clustering ( $\text{BLEND}^{\text{NCDist}}$  followed by  $\text{BLEND}^{\text{SFDist}}$ ). The other half of this dendrogram is shown in Fig. S2.

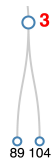

Fig. S4. Portion of the dendrogram in Figs. S2 and S3 showing cluster 3

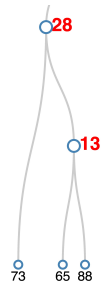

Fig. S5. Portion of the dendrogram in Figs. S2 and S3 showing cluster 28

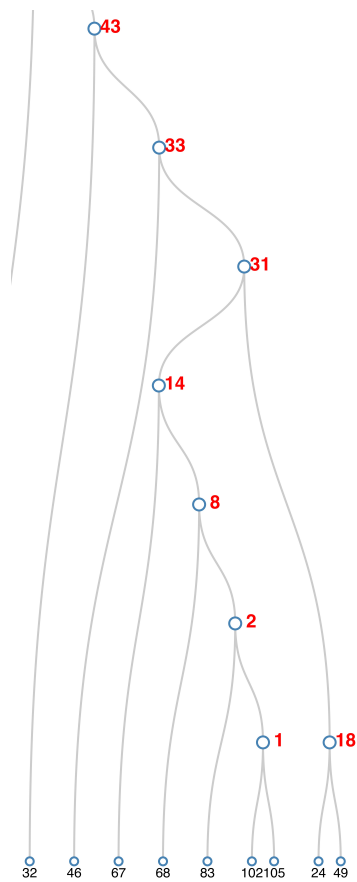

Fig. S6. Portion of the dendrogram in Figs. S2 and S3 showing cluster 43

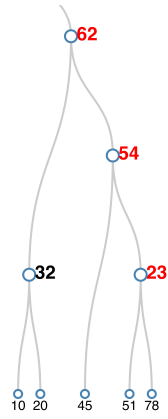

Fig. S7. Portion of the dendrogram in Figs. S2 and S3 showing cluster 62

Table S1. *Data reduction and structure solving statistics. Data are shown for all clusters determined using two factor clustering (NCDist followed by SFDist), continued in Tables S2*

*and S3*

| Cluster Number | Rmerge (%) | Comp. (%) | RefNum | R <sub>work</sub> | R <sub>free</sub> | R <sub>work</sub> | R <sub>free</sub> | CC <sub>work</sub> | CC <sub>free</sub> |
|----------------|------------|-----------|--------|-------------------|-------------------|-------------------|-------------------|--------------------|--------------------|
|                |            |           |        | Overall           |                   | Last shell        |                   | Overall            |                    |
| 001            | 19.80      | 97.12     | 7740   | 0.172             | 0.230             | 0.204             | 0.266             | 0.950              | 0.916              |
| 002            | 22.60      | 99.19     | 7844   | 0.169             | 0.218             | 0.197             | 0.263             | 0.952              | 0.920              |
| 003            | 36.00      | 98.28     | 7909   | 0.212             | 0.286             | 0.345             | 0.349             | 0.946              | 0.904              |
| 004            | 19.30      | 92.99     | 7337   | 0.201             | 0.258             | 0.223             | 0.307             | 0.952              | 0.927              |
| 005            | 39.50      | 99.44     | 8004   | 0.208             | 0.282             | 0.331             | 0.336             | 0.945              | 0.899              |
| 006            | 28.50      | 96.13     | 7826   | 0.204             | 0.271             | 0.357             | 0.265             | 0.952              | 0.915              |
| 007            | 31.70      | 98.99     | 8059   | 0.196             | 0.253             | 0.327             | 0.345             | 0.953              | 0.930              |
| 008            | 23.00      | 99.62     | 7942   | 0.162             | 0.216             | 0.187             | 0.262             | 0.955              | 0.927              |
| 009            | 35.90      | 93.97     | 7580   | 0.235             | 0.315             | 0.368             | 0.333             | 0.935              | 0.887              |
| 010            | 28.70      | 98.60     | 7875   | 0.203             | 0.266             | 0.223             | 0.321             | 0.925              | 0.888              |
| 011            | 38.00      | 99.57     | 8108   | 0.192             | 0.249             | 0.324             | 0.321             | 0.953              | 0.930              |
| 012            | 33.80      | 98.10     | 7744   | 0.201             | 0.258             | 0.286             | 0.309             | 0.950              | 0.925              |
| 013            | 39.10      | 95.42     | 7794   | 0.223             | 0.286             | 0.349             | 0.405             | 0.929              | 0.891              |
| 014            | 25.40      | 99.83     | 7926   | 0.161             | 0.214             | 0.180             | 0.215             | 0.954              | 0.925              |
| 015            | 38.80      | 95.85     | 7851   | 0.220             | 0.287             | 0.307             | 0.308             | 0.937              | 0.902              |
| 016            | 34.70      | 99.36     | 7920   | 0.200             | 0.263             | 0.217             | 0.281             | 0.927              | 0.888              |
| 017            | 25.60      | 96.77     | 7770   | 0.179             | 0.235             | 0.236             | 0.299             | 0.944              | 0.921              |
| 018            | 30.20      | 90.16     | 7158   | 0.185             | 0.249             | 0.249             | 0.300             | 0.941              | 0.898              |
| 019            | 44.30      | 96.72     | 7800   | 0.234             | 0.296             | 0.332             | 0.384             | 0.936              | 0.896              |
| 020            | 32.40      | 99.85     | 7963   | 0.187             | 0.258             | 0.179             | 0.241             | 0.937              | 0.895              |
| 021            | 16.70      | 91.34     | 7298   | 0.173             | 0.247             | 0.275             | 0.309             | 0.952              | 0.914              |
| 022            | 38.20      | 99.74     | 8123   | 0.188             | 0.247             | 0.327             | 0.327             | 0.955              | 0.934              |
| 023            | 28.20      | 91.79     | 7371   | 0.187             | 0.247             | 0.220             | 0.311             | 0.936              | 0.909              |
| 024            | 41.80      | 99.72     | 8039   | 0.209             | 0.281             | 0.332             | 0.348             | 0.942              | 0.894              |
| 026            | 21.50      | 91.55     | 7286   | 0.173             | 0.240             | 0.212             | 0.246             | 0.946              | 0.899              |
| 027            | 39.80      | 99.83     | 8130   | 0.186             | 0.243             | 0.312             | 0.297             | 0.955              | 0.936              |
| 028            | 42.60      | 97.78     | 7988   | 0.212             | 0.271             | 0.352             | 0.403             | 0.940              | 0.915              |
| 029            | 36.10      | 99.85     | 7983   | 0.189             | 0.257             | 0.180             | 0.259             | 0.934              | 0.889              |
| 030            | 43.10      | 99.94     | 8140   | 0.178             | 0.233             | 0.264             | 0.282             | 0.956              | 0.938              |
| 031            | 27.90      | 99.89     | 7933   | 0.159             | 0.212             | 0.177             | 0.216             | 0.954              | 0.926              |
| 033            | 27.10      | 99.95     | 7938   | 0.157             | 0.209             | 0.164             | 0.214             | 0.954              | 0.928              |
| 034            | 54.40      | 94.52     | 7685   | 0.235             | 0.297             | 0.376             | 0.396             | 0.930              | 0.885              |
| 035            | 38.50      | 99.87     | 7985   | 0.196             | 0.266             | 0.190             | 0.251             | 0.929              | 0.880              |
| 036            | 24.40      | 99.25     | 7949   | 0.167             | 0.212             | 0.211             | 0.257             | 0.950              | 0.935              |
| 037            | 45.50      | 83.97     | 6854   | 0.223             | 0.311             | 0.331             | 0.505             | 0.946              | 0.904              |
| 038            | 48.50      | 96.99     | 7990   | 0.260             | 0.316             | 0.402             | 0.386             | 0.919              | 0.890              |
| 039            | 44.20      | 96.51     | 7770   | 0.231             | 0.306             | 0.353             | 0.291             | 0.930              | 0.879              |
| 040            | 43.40      | 99.97     | 8141   | 0.181             | 0.228             | 0.267             | 0.317             | 0.954              | 0.942              |
| 041            | 60.10      | 96.72     | 7938   | 0.259             | 0.345             | 0.362             | 0.421             | 0.901              | 0.829              |
| 042            | 27.60      | 91.75     | 7315   | 0.200             | 0.271             | 0.268             | 0.325             | 0.932              | 0.884              |
| 043            | 28.10      | 99.98     | 7940   | 0.159             | 0.210             | 0.161             | 0.212             | 0.953              | 0.925              |
| 045            | 56.40      | 99.58     | 8097   | 0.214             | 0.270             | 0.353             | 0.358             | 0.944              | 0.916              |
| 046            | 28.40      | 99.98     | 7940   | 0.158             | 0.210             | 0.167             | 0.225             | 0.954              | 0.927              |
| 047            | 51.10      | 97.24     | 7842   | 0.278             | 0.362             | 0.390             | 0.370             | 0.917              | 0.851              |



Table S2. *Data reduction and structure solving statistics. Data are shown for all clusters determined using two factor clustering (NCDist followed by SFDist), continued from*

*Table S1 and continued in Table S3*

| Cluster Number | Rmerge (%) | Comp. (%) | RefNum | R <sub>work</sub> | R <sub>free</sub> | R <sub>work</sub> | R <sub>free</sub> | CC <sub>work</sub> | CC <sub>free</sub> |
|----------------|------------|-----------|--------|-------------------|-------------------|-------------------|-------------------|--------------------|--------------------|
|                |            |           |        | Overall           |                   | Last shell        |                   | Overall            |                    |
| 048            | 40.70      | 99.98     | 7972   | 0.193             | 0.267             | 0.183             | 0.258             | 0.930              | 0.883              |
| 049            | 46.50      | 96.21     | 7771   | 0.272             | 0.350             | 0.416             | 0.404             | 0.910              | 0.842              |
| 050            | 52.70      | 96.94     | 7834   | 0.273             | 0.350             | 0.359             | 0.432             | 0.908              | 0.848              |
| 051            | 48.60      | 99.97     | 8141   | 0.177             | 0.230             | 0.253             | 0.309             | 0.955              | 0.939              |
| 052            | 40.30      | 92.89     | 7586   | 0.233             | 0.310             | 0.381             | 0.407             | 0.932              | 0.876              |
| 053            | 49.60      | 99.92     | 8053   | 0.204             | 0.275             | 0.297             | 0.296             | 0.944              | 0.898              |
| 054            | 39.80      | 97.44     | 7861   | 0.212             | 0.278             | 0.269             | 0.395             | 0.918              | 0.882              |
| 055            | 49.40      | 95.61     | 7812   | 0.222             | 0.304             | 0.343             | 0.446             | 0.945              | 0.909              |
| 056            | 24.90      | 99.50     | 7940   | 0.163             | 0.214             | 0.197             | 0.267             | 0.951              | 0.933              |
| 057            | 38.40      | 98.92     | 7810   | 0.204             | 0.261             | 0.273             | 0.337             | 0.948              | 0.923              |
| 058            | 54.80      | 99.63     | 8137   | 0.206             | 0.265             | 0.341             | 0.400             | 0.942              | 0.919              |
| 059            | 52.10      | 99.98     | 8052   | 0.202             | 0.276             | 0.282             | 0.296             | 0.942              | 0.895              |
| 060            | 55.80      | 99.57     | 8049   | 0.261             | 0.349             | 0.387             | 0.426             | 0.925              | 0.860              |
| 062            | 40.80      | 99.28     | 7919   | 0.193             | 0.264             | 0.230             | 0.340             | 0.935              | 0.901              |
| 063            | 48.70      | 96.83     | 7875   | 0.314             | 0.408             | 0.348             | 0.479             | 0.877              | 0.789              |
| 064            | 57.90      | 99.91     | 8165   | 0.202             | 0.259             | 0.333             | 0.370             | 0.941              | 0.920              |
| 065            | 53.20      | 99.99     | 8039   | 0.204             | 0.276             | 0.288             | 0.334             | 0.942              | 0.898              |
| 066            | 50.70      | 98.52     | 7985   | 0.270             | 0.350             | 0.404             | 0.366             | 0.914              | 0.849              |
| 067            | 49.90      | 96.12     | 7726   | 0.299             | 0.364             | 0.290             | 0.388             | 0.888              | 0.853              |
| 068            | 59.40      | 92.95     | 7526   | 0.257             | 0.338             | 0.388             | 0.384             | 0.914              | 0.857              |
| 069            | 61.50      | 99.92     | 8166   | 0.201             | 0.259             | 0.324             | 0.371             | 0.938              | 0.918              |
| 070            | 61.50      | 87.62     | 7190   | 0.291             | 0.363             | 0.403             | 0.233             | 0.897              | 0.833              |
| 071            | 54.10      | 99.92     | 8166   | 0.175             | 0.228             | 0.233             | 0.247             | 0.954              | 0.937              |
| 072            | 43.10      | 99.99     | 7941   | 0.181             | 0.234             | 0.185             | 0.285             | 0.941              | 0.905              |
| 073            | 36.10      | 99.99     | 7976   | 0.168             | 0.234             | 0.194             | 0.283             | 0.946              | 0.918              |
| 074            | 62.40      | 97.86     | 7855   | 0.289             | 0.363             | 0.315             | 0.404             | 0.893              | 0.853              |
| 075            | 55.90      | 99.99     | 8039   | 0.204             | 0.276             | 0.284             | 0.336             | 0.940              | 0.893              |
| 076            | 63.00      | 97.94     | 7931   | 0.261             | 0.340             | 0.376             | 0.328             | 0.914              | 0.854              |
| 077            | 67.00      | 99.98     | 8107   | 0.280             | 0.335             | 0.381             | 0.338             | 0.904              | 0.872              |
| 079            | 89.50      | 99.00     | 7974   | 0.377             | 0.417             | 0.440             | 0.501             | 0.740              | 0.710              |
| 080            | 64.40      | 98.94     | 7941   | 0.291             | 0.362             | 0.325             | 0.384             | 0.896              | 0.847              |
| 082            | 59.70      | 98.13     | 8053   | 0.281             | 0.369             | 0.363             | 0.424             | 0.899              | 0.845              |
| 083            | 56.60      | 99.99     | 8039   | 0.206             | 0.276             | 0.267             | 0.340             | 0.936              | 0.891              |
| 084            | 78.80      | 99.49     | 8014   | 0.372             | 0.411             | 0.395             | 0.424             | 0.790              | 0.760              |
| 086            | 64.20      | 98.45     | 7904   | 0.313             | 0.372             | 0.415             | 0.452             | 0.868              | 0.810              |
| 087            | 69.30      | 99.52     | 7988   | 0.290             | 0.364             | 0.328             | 0.392             | 0.896              | 0.847              |
| 090            | 90.30      | 99.89     | 8020   | 0.358             | 0.408             | 0.367             | 0.472             | 0.791              | 0.737              |
| 091            | 71.00      | 99.75     | 8079   | 0.249             | 0.341             | 0.353             | 0.378             | 0.911              | 0.846              |
| 092            | 35.20      | 99.99     | 7976   | 0.165             | 0.229             | 0.188             | 0.241             | 0.948              | 0.919              |
| 093            | 36.20      | 90.95     | 7230   | 0.225             | 0.296             | 0.334             | 0.341             | 0.923              | 0.863              |
| 094            | 36.50      | 92.16     | 7324   | 0.221             | 0.292             | 0.319             | 0.338             | 0.923              | 0.864              |
| 095            | 64.00      | 99.95     | 8105   | 0.267             | 0.354             | 0.392             | 0.355             | 0.916              | 0.855              |
| 096            | 74.70      | 99.91     | 8092   | 0.243             | 0.329             | 0.349             | 0.386             | 0.915              | 0.853              |

Table S3. *Data reduction and structure solving statistics. Data are shown for all clusters determined using two factor clustering (NCDist followed by SFDist), continued from*

*Tables S1 and S2*

| Cluster Number | Rmerge (%) | Comp. (%) | RefNum | R <sub>work</sub><br>Overall | R <sub>free</sub> | R <sub>work</sub><br>Last shell | R <sub>free</sub><br>shell | CC <sub>work</sub><br>Overall | CC <sub>free</sub> |
|----------------|------------|-----------|--------|------------------------------|-------------------|---------------------------------|----------------------------|-------------------------------|--------------------|
| 098            | 63.80      | 99.92     | 8166   | 0.183                        | 0.232             | 0.217                           | 0.234                      | 0.947                         | 0.932              |
| 099            | 92.50      | 99.89     | 8020   | 0.336                        | 0.386             | 0.384                           | 0.458                      | 0.802                         | 0.764              |
| 100            | 48.60      | 99.28     | 7740   | 0.210                        | 0.270             | 0.283                           | 0.357                      | 0.943                         | 0.911              |
| 101            | 58.20      | 99.99     | 7941   | 0.203                        | 0.254             | 0.184                           | 0.258                      | 0.919                         | 0.883              |
| 102            | 59.70      | 99.99     | 7976   | 0.204                        | 0.269             | 0.190                           | 0.286                      | 0.921                         | 0.870              |
| 103            | 96.60      | 99.93     | 7790   | 0.303                        | 0.380             | 0.394                           | 0.416                      | 0.820                         | 0.736              |
| 104            | 61.70      | 99.99     | 7946   | 0.208                        | 0.270             | 0.187                           | 0.285                      | 0.916                         | 0.868              |
| 105            | 92.60      | 99.93     | 7790   | 0.247                        | 0.317             | 0.272                           | 0.359                      | 0.859                         | 0.793              |
| 106            | 88.60      | 99.99     | 7946   | 0.242                        | 0.315             | 0.261                           | 0.343                      | 0.855                         | 0.764              |
